# Supplementary material for: Experimental Design for Stochastic Models of Nonlinear Signaling Pathways Using an Interval-Wise Linear Noise Approximation and State Estimation
Source: PubMed Central journal article supplement (PMC5008843; doi:10.1371/journal.pone.0159902), 2016-09-01

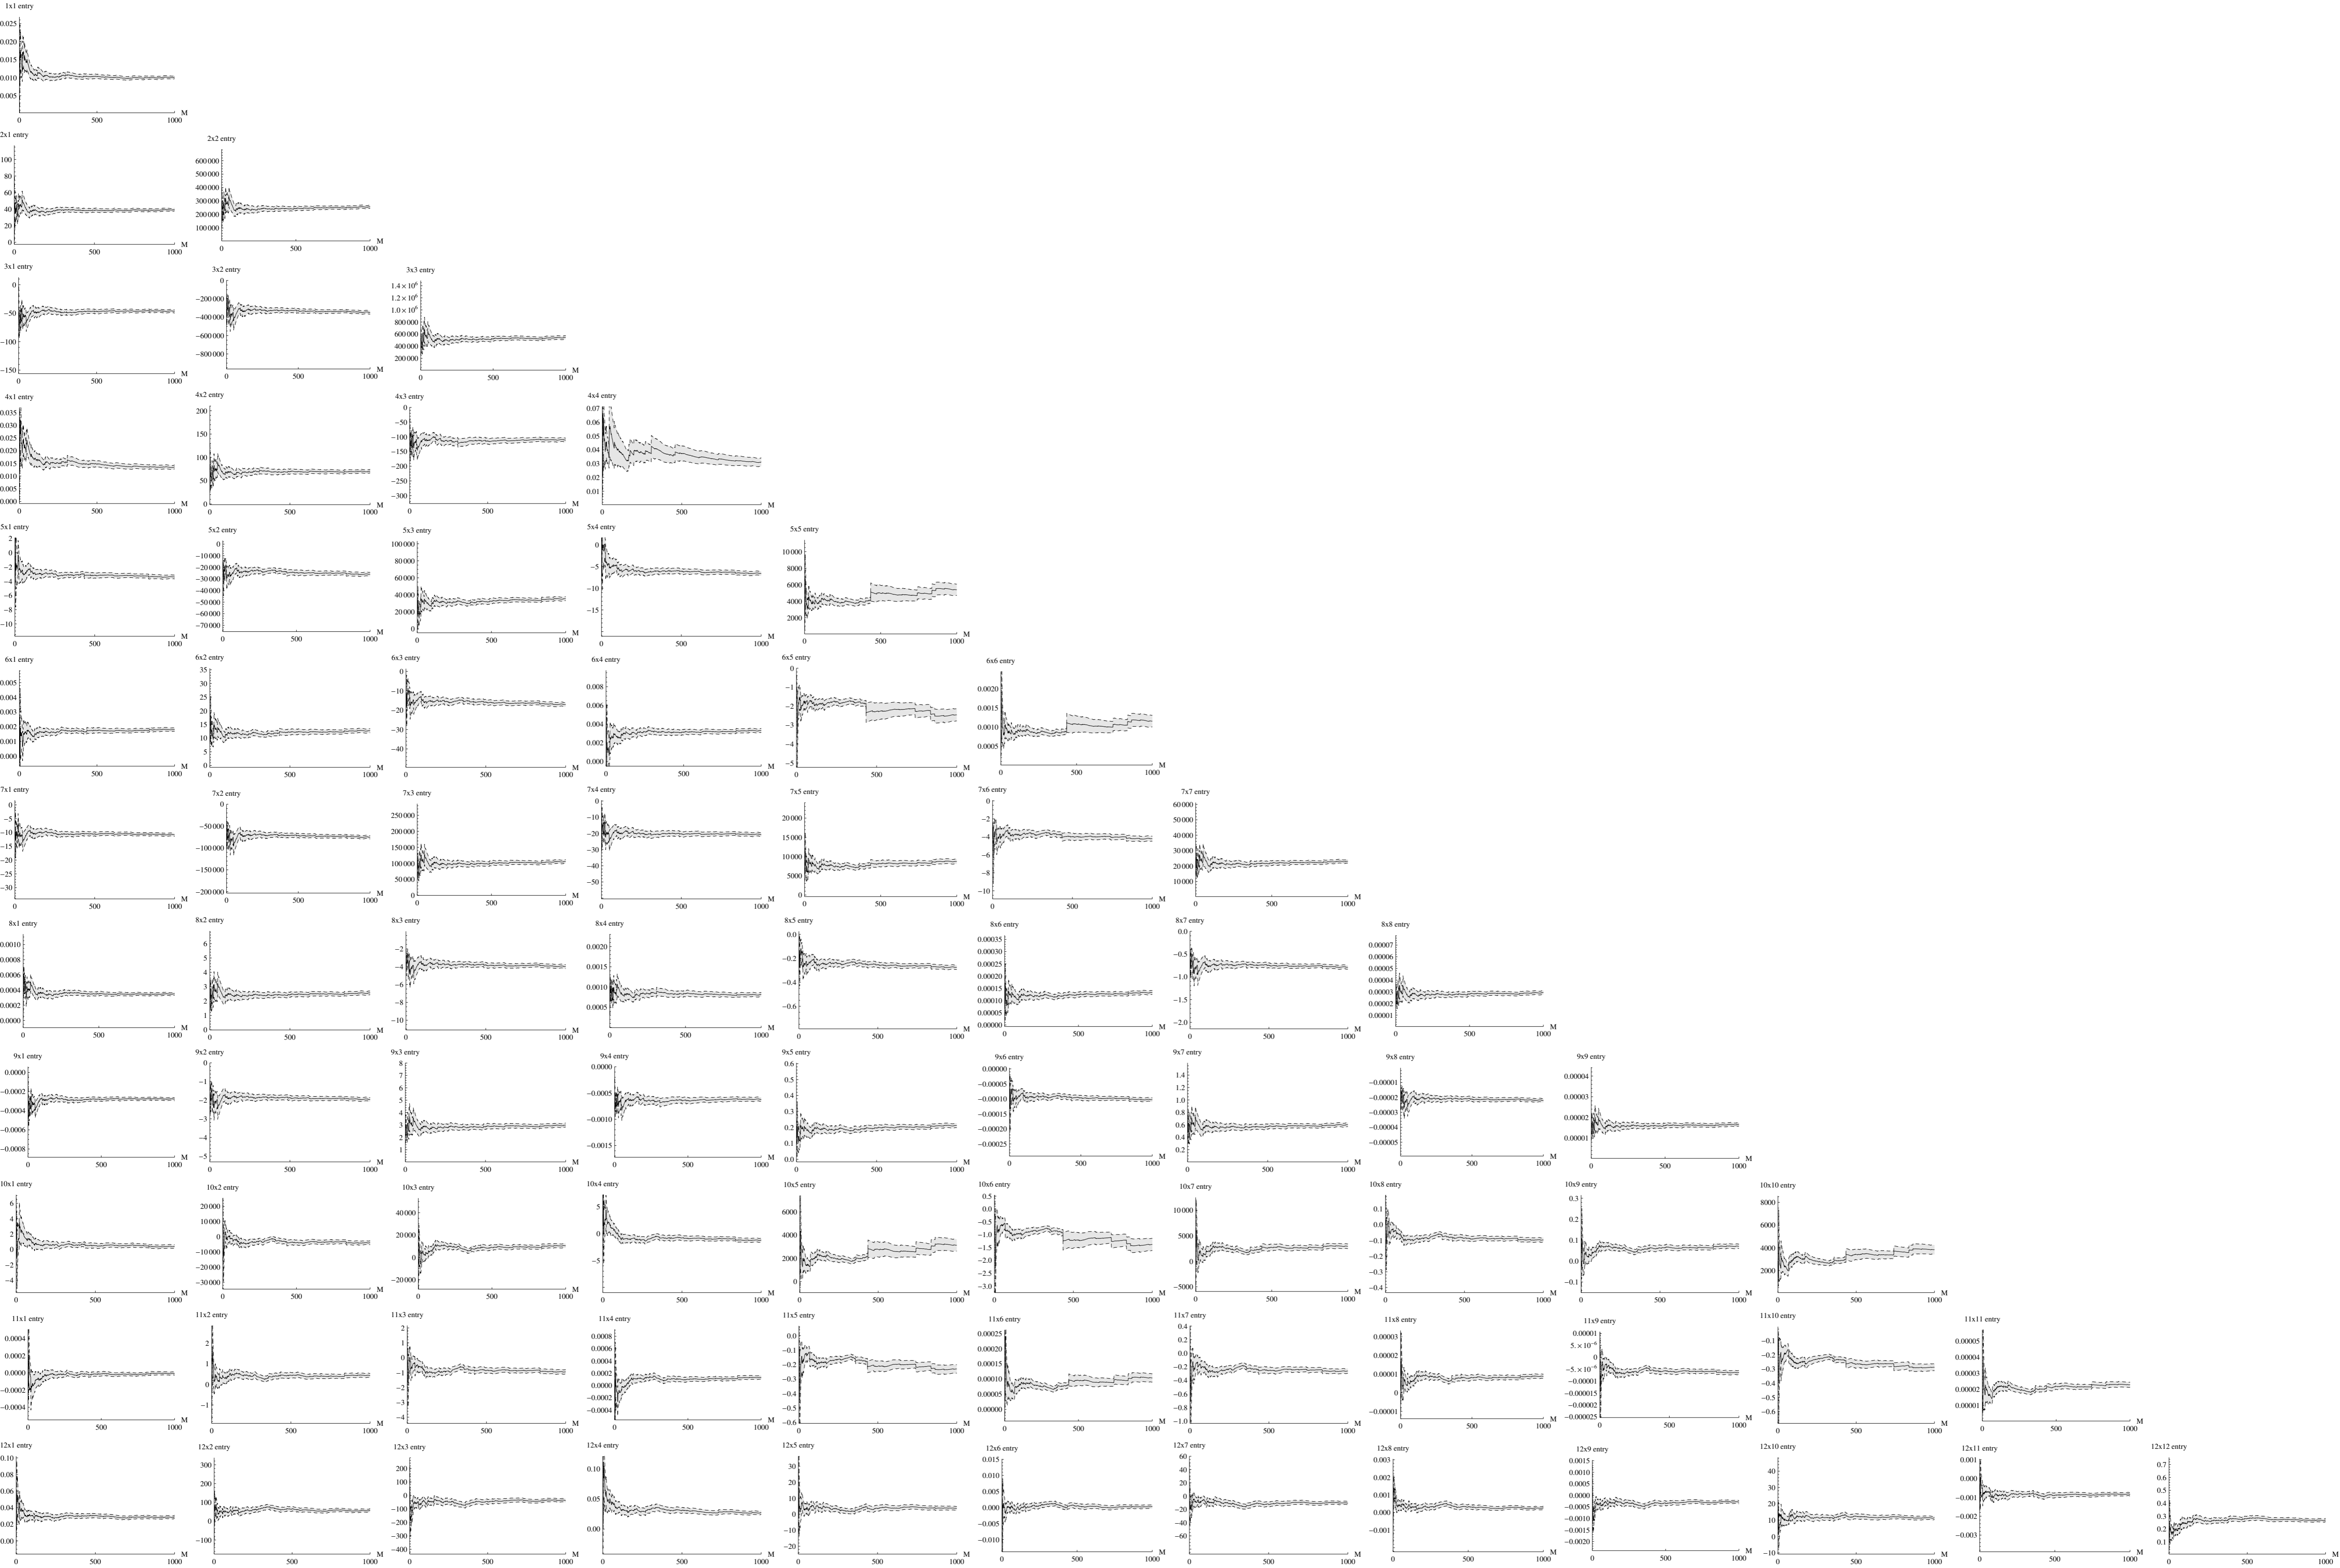

Supplement: pone.0159902.s005.pdf [file pone.0159902.s005.pdf]
